# Supplementary material for: NS2B/NS3 mutations enhance the infectivity of genotype I Japanese encephalitis virus in amplifying hosts
Source: PubMed Central journal article supplement (PMC6695206; doi:10.1371/journal.ppat.1007992), 2019-08-05
Supplement: ppat.1007992.s011.pdf [file ppat.1007992.s011.pdf]

S1 Table. Primers used to construct recombinant and site-direct mutated infectious clones.

| Infectious clones  | Primer name          | Primers 5'-3'                          | Templates          |
|--------------------|----------------------|----------------------------------------|--------------------|
| pCMV GI            | HDVr-F               | GGGTCGGCATGGCATCTC                     | pCMV GIII          |
|                    | CMV-R                | GGTTCACTAAACCAGCTCTGCTTATATAG          |                    |
|                    | JGI 5'UTR-F          | 5'p-AGAAGTTTATCTGTGTGAACTTCTTGGC       | GI virus cDNA      |
|                    | JGI 3'UTR-R          | 5'p-AGATCCTGTGTTCTTCCTCACCAC           |                    |
| pCMV GIII/GI UTR   | JGI 3'UTR-F          | TAGATAGGATTAAGTCATGTGTGTAATGTG         | pCMV GI            |
|                    | JGI 5'UTR-R          | GGTTGTTCTTCCGTTCTAAAAAAC               | pCMV GIII          |
|                    | Vector-GIII capsid-F | ttagaacggaagaacaaccATGACTAAAAAACAGGAGG |                    |
|                    | Vector-GIII NS5-R    | acatgacttaatcctatctaGATGACCCTGTCTTCCTG |                    |
| pCMV GIII/GI C-E   | JGIII NS1-F          | GCACTGGATGTGCCATTGAC                   | pCMV GIII          |
|                    | JGIII 5'UTR-R        | GGTTATCTTCCGTTCTAAAAAACTGTT            |                    |
|                    | JGI capsid-F         | 5'p-ATGACTAAAAAACAGGAGGGCC             | GI virus cDNA      |
|                    | JGI E-R              | 5'p-GGCATGCACGTTGGTCGCTAA              |                    |
| pCMV GIII/GI NS1-5 | JGIII 3'UTR-F        | TAGTGTGATTTAAGGTAGAAAAGTAGACTATGT      | pCMV GIII          |
|                    | JGIII E-R            | AGCATGCACATTGGTCGCTA                   |                    |
|                    | JGI NS1-F            | 5'p-GATACTGGCTGTGCCATTGATATCAC         | GI virus cDNA      |
|                    | JGI NS5-R            | 5'p-AATGACCCTGTCCCTCCTGAATCAATAC       |                    |
| pCMV GIII/GI NS1-3 | JGIII 3'UTR-F        | TAGTGTGATTTAAGGTAGAAAAGTAGACTATGT      | pCMV GIII/GI NS1-5 |
|                    | JGI NS3-R            | TCTCTTGCCCGCTGCAAATCC                  |                    |
|                    | vector-GIII NS4A-F   | atthtcagcgggcaagagaTCAGCCGTTAGCTTCATAG | pCMV GIII          |

|                               |                   |                                                        |                       |
|-------------------------------|-------------------|--------------------------------------------------------|-----------------------|
|                               | vector-GIII NS5-R | tttaccttaaatcacactaGATGACCCTGTCTTCCTG                  |                       |
| pCMV GIII/GI<br>NS4-5         | JGIII 3'UTR-F     | TAGTGTGATTTAAGGTAGAAAAGTAGACTATGT                      | pCMV GIII             |
|                               | JGIII NS3-R       | TCTCTTTCCTGCTGCGAAGTCT                                 |                       |
|                               | vector-GI NS4A-F  | acttcgcagcaggaaagagaTCAGCCGTCAGTTTCATAG                | pCMV GI               |
|                               | vector-GI NS5-R   | tacttttctaccttaaatcacactaAATGACCCTGTCTCCTGAATCAATACATC |                       |
| pCMV GI/GIII<br>NS1-5         | JGI 3'UTR-F       | TAGATAGGATTAAGTCATGTGTGTAATGTG                         | pCMV GI               |
|                               | JGI E-R           | 5'p-GGCATGCACGTTGGTCGCTAA                              |                       |
|                               | Vector-GIII NS1-F | tagcgaccaacgtgcatgccGACACTGGATGTGCCATTG                | pCMV GIII             |
|                               | Vector-GIII NS5-R | acatgacttaatcctatctaGATGACCCTGTCTTCCTG                 |                       |
| pCMV GI/GIII<br>NS1-3         | JGI NS4A-F        | TCAGCCGTCAGTTTCATAGAGGTG                               | pCMV GI               |
|                               | JGI E-R           | 5'p-GGCATGCACGTTGGTCGCTAA                              |                       |
|                               | vector-GIII NS1-F | tagcgaccaatgtgcatgctGACACTGGATGTGCCATTG                | pCMV GIII             |
|                               | vector-GIII NS3-R | tctatgaaactgacggctgaTCTCTTTCCTGCTGCGAAG                |                       |
| pCMV GIII/GI<br>NS1-3 mutants | NS1 Q51K          | ACCCCGCACACTCCTTCcttATGTGCTTTATGGACGATCTTC             | pCMV GIII/GI<br>NS1-3 |
|                               | NS1 S70A          | CATTCAGTTCGTCCCGCACggcTTCCACATCTGGTGTTC                |                       |
|                               | NS1 R147H         | GCATGCTATTCCAGGCTCTgtgCTCATCAGGGCATTCCCTTG             |                       |
|                               | NS1 L206Y         | CTCAAGTTTCCAGGTGTCATTgtaACGGCTCTCAATCCAGTATGA          |                       |
|                               | NS1 R251K         | TCTCCGGTTGTGCTTGCTtttCGGTCCAGCTATGGTGTGT               |                       |
|                               | NS1 I298V         | CTTTCCACTGTCAGTAGTAGTTCTgacTGAGGGACCCCTCTTGC           |                       |
|                               | NS2A I6V          | CCCAGCTGAAAAGGGTcaacCATTTGCGCGTTGAAAGC                 |                       |
|                               | NS2A A97T         | CTCTTGGTTCGTCCATCTcgtGCTAAGCATGTTTCATGACCAGA           |                       |
|                               | NS2A T149S        | GACTGGCATGGCAACggaAGAAGTTGTGGGAAATGTGATCG              |                       |

|                                  |            |                                                   |           |
|----------------------------------|------------|---------------------------------------------------|-----------|
|                                  | NS2A R187K | TCTTCTTCGCCATGGTCTTtttCCTCTCTTGCAGCAGGGA          |           |
|                                  | NS2B E65D  | GGCTACTTCCTGTGATTGCAGCcatcCATCTCCCAGCTGATATCGG    |           |
|                                  | NS2B L99V  | GCCGATACAAGACATACGCAAagacCCAGACTTTCCATGGAACACC    |           |
|                                  | NS3 S78A   | CTCCACGGGCCTCCATAagcTATGCGGTCTTCCTTCACACT         |           |
|                                  | NS3 P105A  | GGTTTTGTCTGGATGTTTACTGCagcTTTCCCTGGTTCCACCACG     |           |
|                                  | NS3 D177E  | AGCATGCTTGGAGTGTAGGCttcTGGAAGTGGTTCCTCTTGACG      |           |
|                                  | NS3 S182N  | AGTCATCTGTCTCTTTTTTCAGCATgttTGGAGTGTAGGCATCTGGAAC |           |
| pCMV GIII<br>NS2B/NS3<br>mutants | NS2B V99L  | AATGCAAGACATGCGCAGgagCCAGACCTTCCATGGAACAC         | pCMV GIII |
|                                  | NS3 A78S   | CTCCATGGGCCTCCGTAgctTATGCGGTCTTCTTTCACACTAC       |           |
|                                  | NS3 E177D  | CAACATGTTTGGGGTGTAAAGCcatcTGGGACTGGTTCCTCCTG      |           |
